# Supplementary material for: Resistance-Nodulation-Division Efflux Pump, LexABC, Contributes to Self-Resistance of the Phenazine Di-N-Oxide Natural Product Myxin in Lysobacter antibioticus
Source: PubMed Central journal article supplement (PMC7927275; doi:10.3389/fmicb.2021.618513), 2021-02-17
Supplement: Image_1.pdf [file Image_1.pdf]

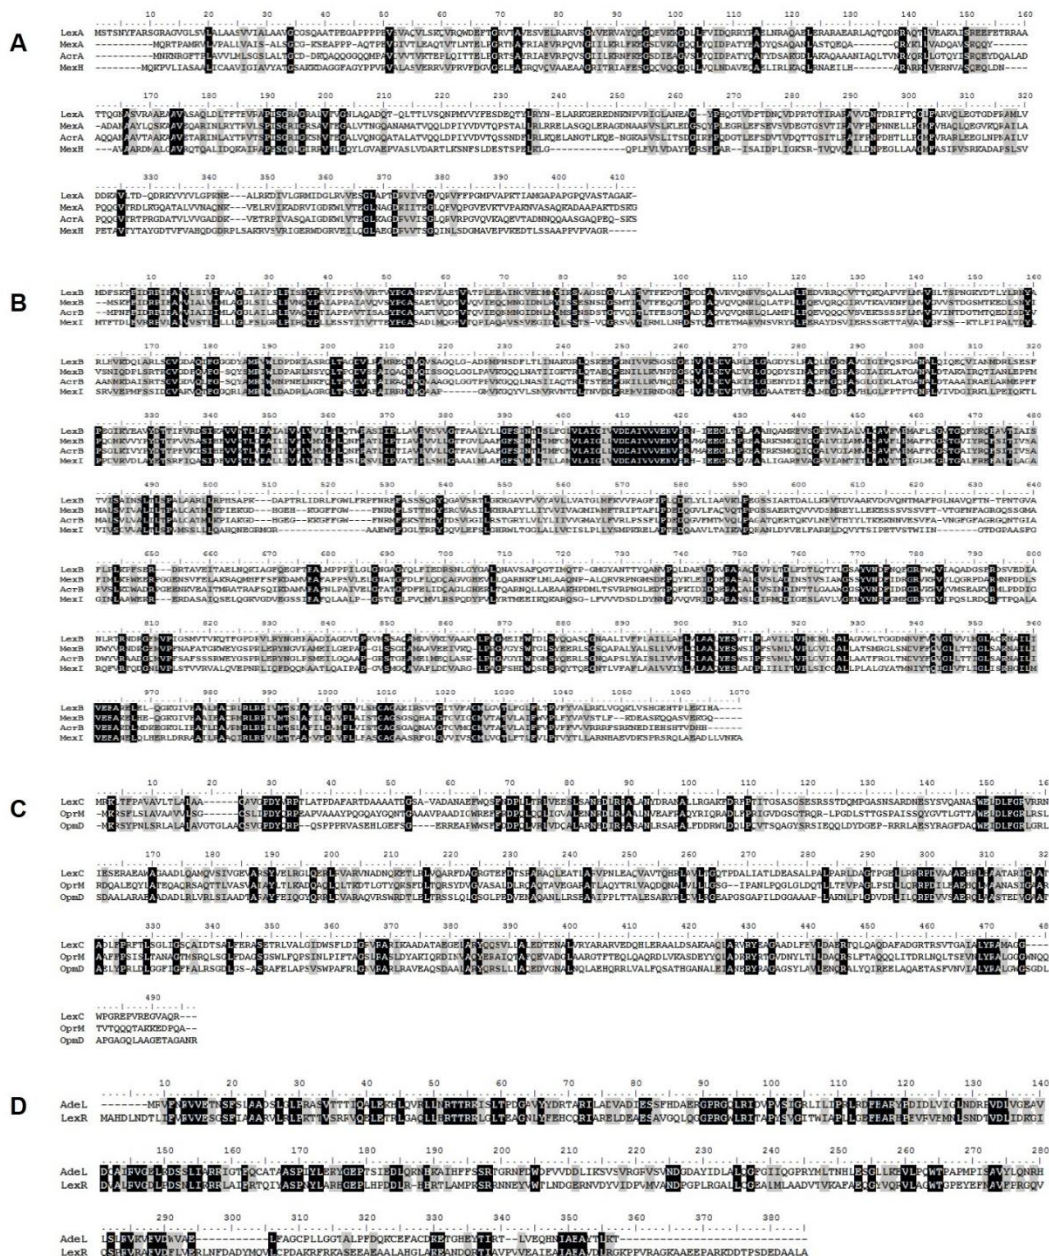

**FIGURE S1** Multiple alignment of the amino acid sequence of LexA, LexB, LexC and LexR. (A) LexA from *L. antibioticus* OH13 (MW029615), MexA from *Pseudomonas aeruginosa* PAO1 (NP\_249116.1), AcrA from *Escherichia coli* str. K-12 substr. MG1655 (NP\_414996.1), MexH from *P. aeruginosa* PAO1 (NP\_252895.1). (B) LexB from *L. antibioticus* OH13 (MW029616), MexB from *Pseudomonas aeruginosa* PAO1 (NP\_249117.1), AcrB from *Escherichia coli* str. K-12 substr. MG1655 (NP\_414995.1), MexI from *P. aeruginosa* PAO1 (NP\_252896.1). (C) LexC from *L. antibioticus* OH13 (MW029617), OprM from *P. aeruginosa* PAO1 (NP\_249118.1), OpmD from *P. aeruginosa* PAO1 (NP\_252897.1). (D) LexR from *L. antibioticus* OH13 (MW029618), AdeL from *Acinetobacter baumannii* (AXV51761.1).
