# Supplementary material for: Resistance-Nodulation-Division Efflux Pump, LexABC, Contributes to Self-Resistance of the Phenazine Di-N-Oxide Natural Product Myxin in Lysobacter antibioticus
Source: PubMed Central journal article supplement (PMC7927275; doi:10.3389/fmicb.2021.618513), 2021-02-17
Supplement: Image_2.pdf [file Image_2.pdf]

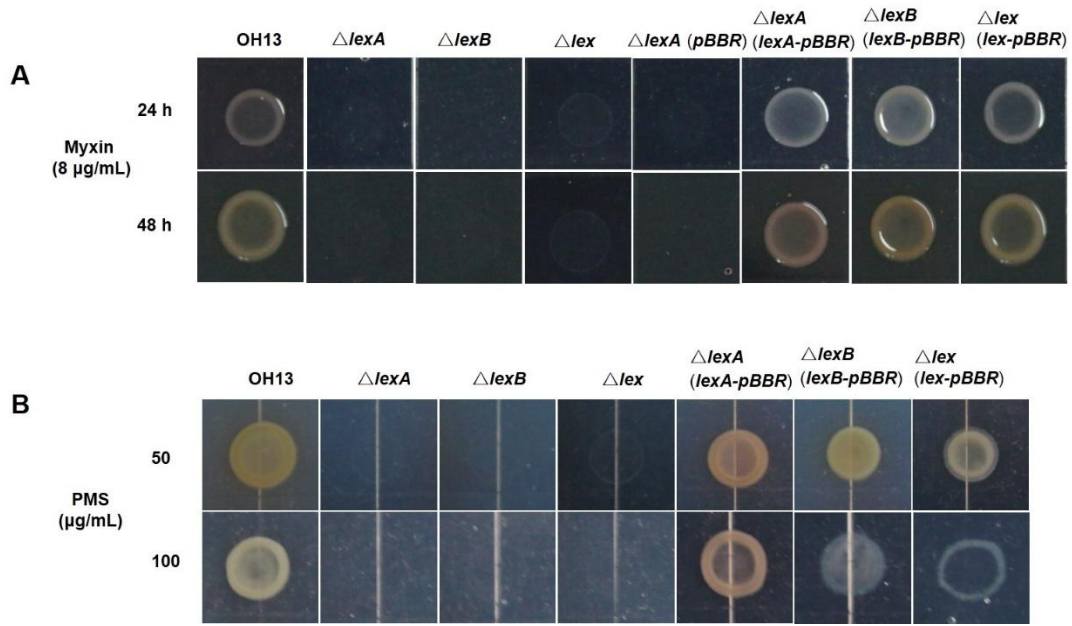

**FIGURE S2** Growth of *L. antibioticus* OH13 and its derivatives on media containing myxin and PMS. **(A)** Strains cultured on media containing 8  $\mu\text{g}/\text{mL}$  myxin for 24 and 48 h. **(B)** Strains cultured on media containing 50 and 100  $\mu\text{g}/\text{mL}$  PMS for 48 h.
