# Supplementary material for: Resistance-Nodulation-Division Efflux Pump, LexABC, Contributes to Self-Resistance of the Phenazine Di-N-Oxide Natural Product Myxin in Lysobacter antibioticus
Source: PubMed Central journal article supplement (PMC7927275; doi:10.3389/fmicb.2021.618513), 2021-02-17
Supplement: Image_3.pdf [file Image_3.pdf]

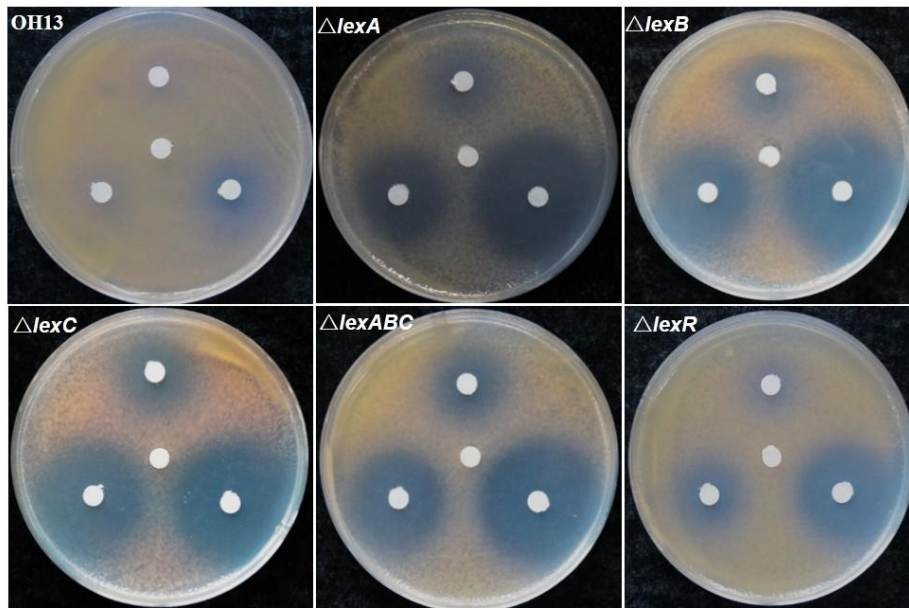

**FIGURE S3** Inhibition assay of myxin against *L. antibioticus* OH13, *lexA*, *lexB*, *lexC*, *lexABC*, *lexR* mutants. On a plate, center, negative control; top, 0.125  $\mu\text{g}$  myxin; left, 0.25  $\mu\text{g}$  myxin; right, 0.5  $\mu\text{g}$  myxin.
