# Supplementary material for: Resistance-Nodulation-Division Efflux Pump, LexABC, Contributes to Self-Resistance of the Phenazine Di-N-Oxide Natural Product Myxin in Lysobacter antibioticus
Source: PubMed Central journal article supplement (PMC7927275; doi:10.3389/fmicb.2021.618513), 2021-02-17
Supplement: Image_4.pdf [file Image_4.pdf]

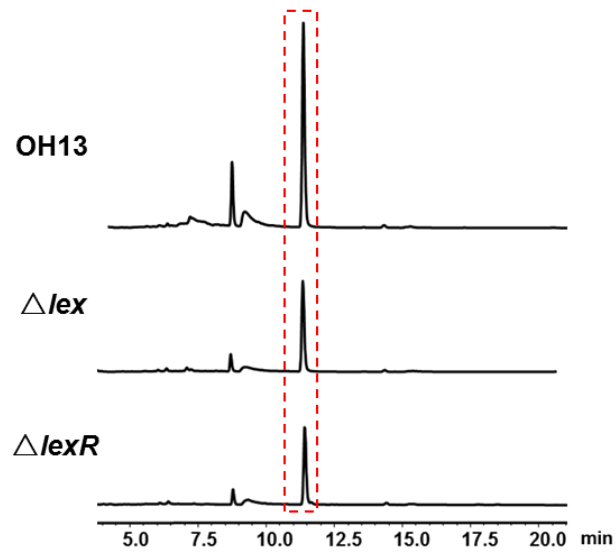

**FIGURE S4** HPLC analysis of intracellular phenazine from OH13,  $\Delta lex$  and  $\Delta lexR$  strains. Dashed box indicates the compound **2**.
